# Supplementary material for: Expanding the Drosophila toolkit for dual control of gene expression
Source: bioRxiv preprint, doi:10.1101/2023.08.15.553399, version 5 (2024-03-05)
Supplement: Supplementary File 6 [file 553399_file13.xlsx]

## Sheet: Sheet1
Supplementary File 6. Primers used to amplify large enhancers for cloning into pMCS-T2A-QF2-T2A-LexA-GAD-WALIUM20. The dpp-blk primers have NotI and EcoRI sites for cloning into the MCS, and the Dilp2-enh primers have PacI and EcoRI sites.
Name	Sequence
dpp-blk-fwd	ATTGCGGCCGCTTGCAATGGCCCAGGCTCTG
dpp-blk-rev	GCCGAATTCCAGTGCTGGGAACGTGG
Dilp2-enh-fwd	GAGTTAATTAACCATGGCGATGGCGATGA
Dilp2-enh-rev	CGCGAATTCAGGTTGCTTTACGATCAAATGGATTA
dpp-test1-fwd	TGAGCCTGATTAACCAACCG
Dilp2-test1-fwd	CACTCATCGCATCCTAACAC
